# Supplementary material for: Magnesium modulates phospholipid metabolism to promote bacterial phenotypic resistance to antibiotics
Source: eLife journal article supplement (doi:10.7554/elife.100427), 2024-08-12
Supplement: data1 [file elife-100427-data1-v1.zip]

TolC

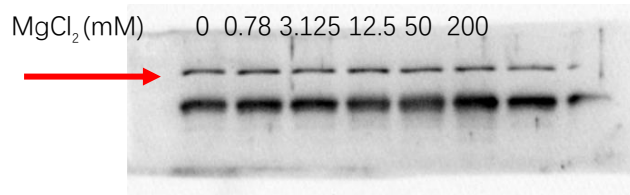

Appendix 1. source data 1. Original membranes corresponding to Figure 1D (TolC). SDS-PAGE gels were cut with one part used to stain with Coomassie blue as loading control, while the other part were used for western-blot. Red arrows indicate the location of protein of interest.
