# Supplementary material for: Magnesium modulates phospholipid metabolism to promote bacterial phenotypic resistance to antibiotics
Source: eLife journal article supplement (doi:10.7554/elife.100427), 2024-08-12
Supplement: fig3-data1 [file elife-100427-fig3-data1-v1.zip]

FabA

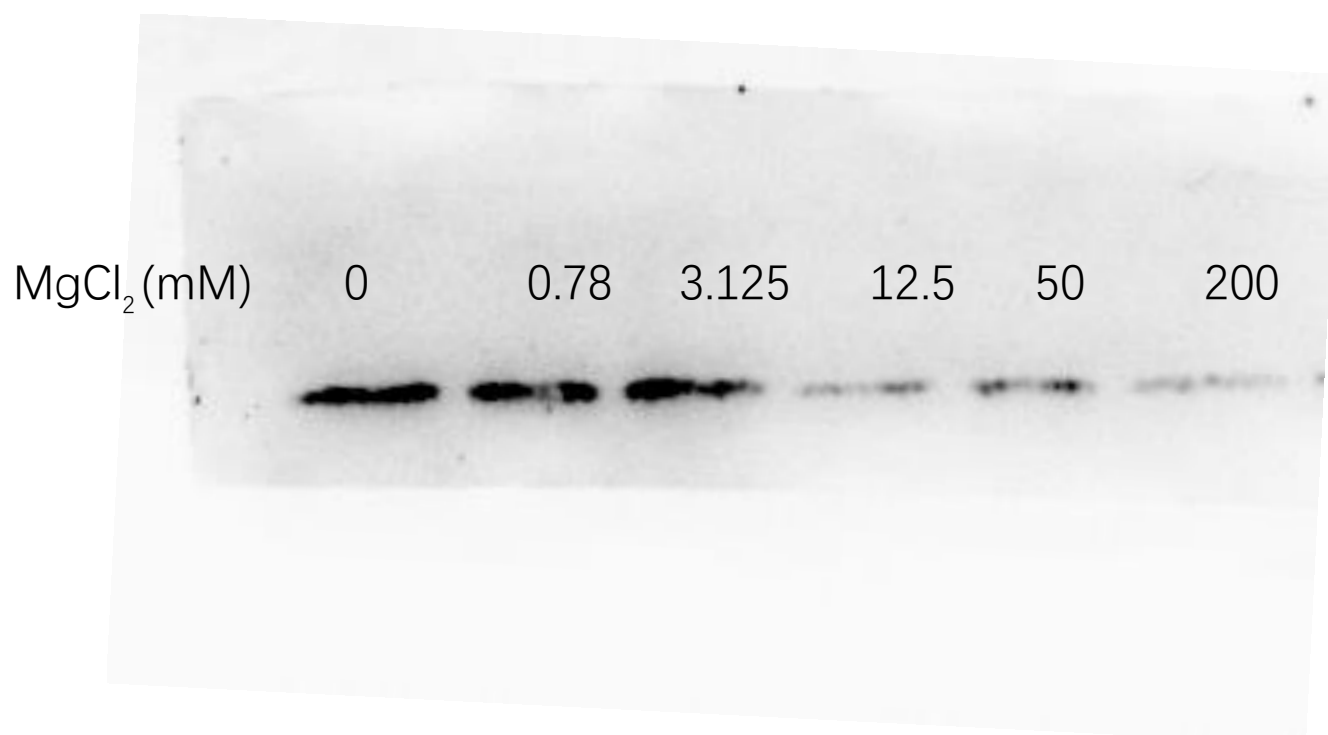

FabF

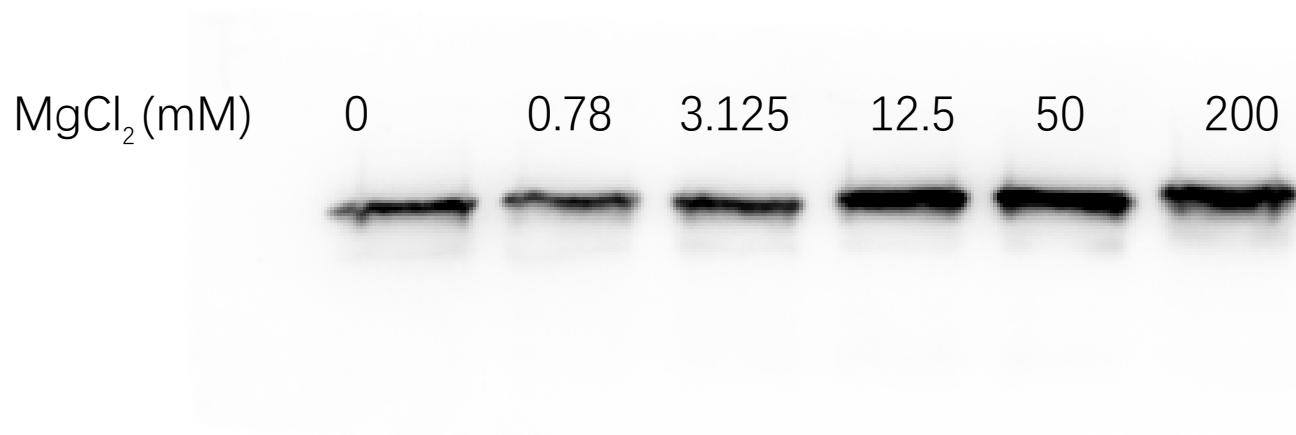

FadL

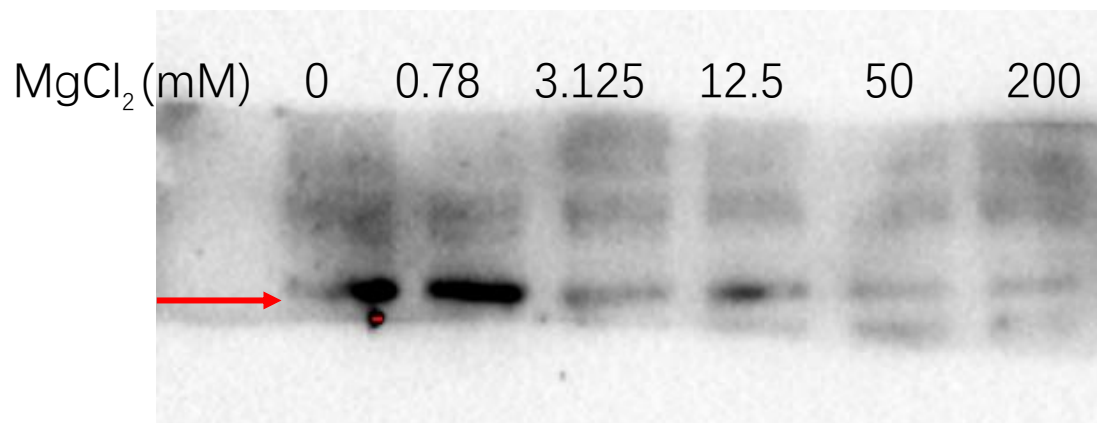

FadR

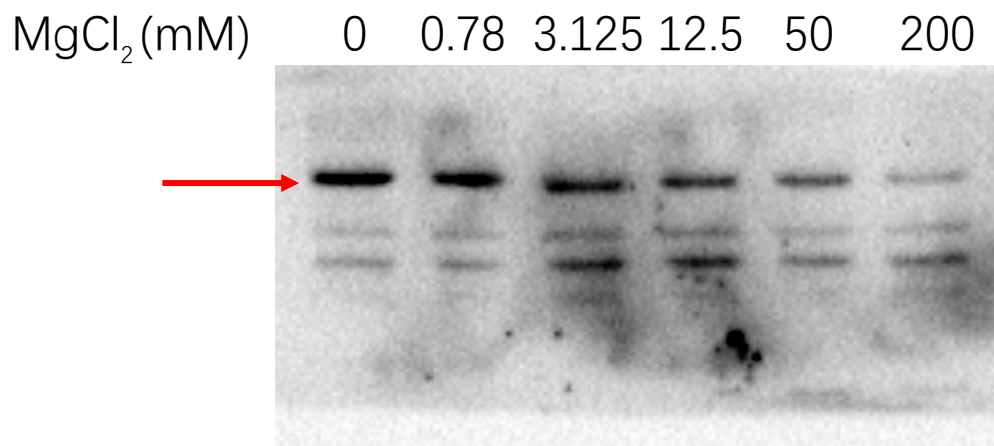

Figure 3. source data 1. Original membranes corresponding to Figure 3D (FabA and FabF), Figure 3I (FadL) and Figure 3K (FadR). SDS-PAGE gels were cut with one part used to stain with Coomassie blue as loading control, while the other part were used for western-blot. Red arrows indicate the location of protein of interest.
